# Supplementary material for: A 70% cut-off for MYC protein expression in diffuse large B-cell lymphoma identifies a high-risk group of patients
Source: PubMed Central journal article supplement — Haematologica. 2020 Feb 13;105(11):2667–70. doi: 10.3324/haematol.2019.235556 (PMC7604633; doi:10.3324/haematol.2019.235556), 2020-02-13
Supplement: 2019_235556-Disclosures_Contributions.pdf [file 2019_235556-Disclosures_Contributions.pdf]

Haematologica  
HAEMATOL/2019/235556  
Version 3

A 70% cut-off for MYC protein expression in diffuse large B cell lymphoma identifies a high-risk group of patients

Marita Ziepert, Stefano Lazzi, Raffaella Santi, Federica Vergoni, Massimo Granai, Virginia Mancini, Annette Staiger, Heike Horn, Markus Löffler, Viola Pöschel, Gerhald Held, Gerald Wulf, Lorenz H. Trümper, Norbert Schmitz, Andreas Rosenwald, Elena Sabattini, Kikkeri N. Naresh, Harald Stein, German Ott, and Lorenzo Leoncini

Disclosures: none

Contributions: M. Z. wrote the manuscript. R. F., F. V., M. G., V. M., A. S., H. H., M. L., V. P., G. H., G. W., L. H. T., N. S., A. R. collected data. E. S., K. N., H. S., G. O., L.L. supervised the study
